# Supplementary material for: Nanomechanical Atomic Force Microscopy to Probe Cellular Microplastics Uptake and Distribution
Source: MDPI journal article supplement (doi:10.3390/ijms23020806), 2022-01-12
Supplement: s1 [file s1]

## Supplementary Information

# Nanomechanical atomic force microscopy to probe cellular microplastics uptake and distribution

Farida Akhatova, Ilnur Ishmukhametov, Gölnur Fakhrullina and Rawil Fakhrullin \*

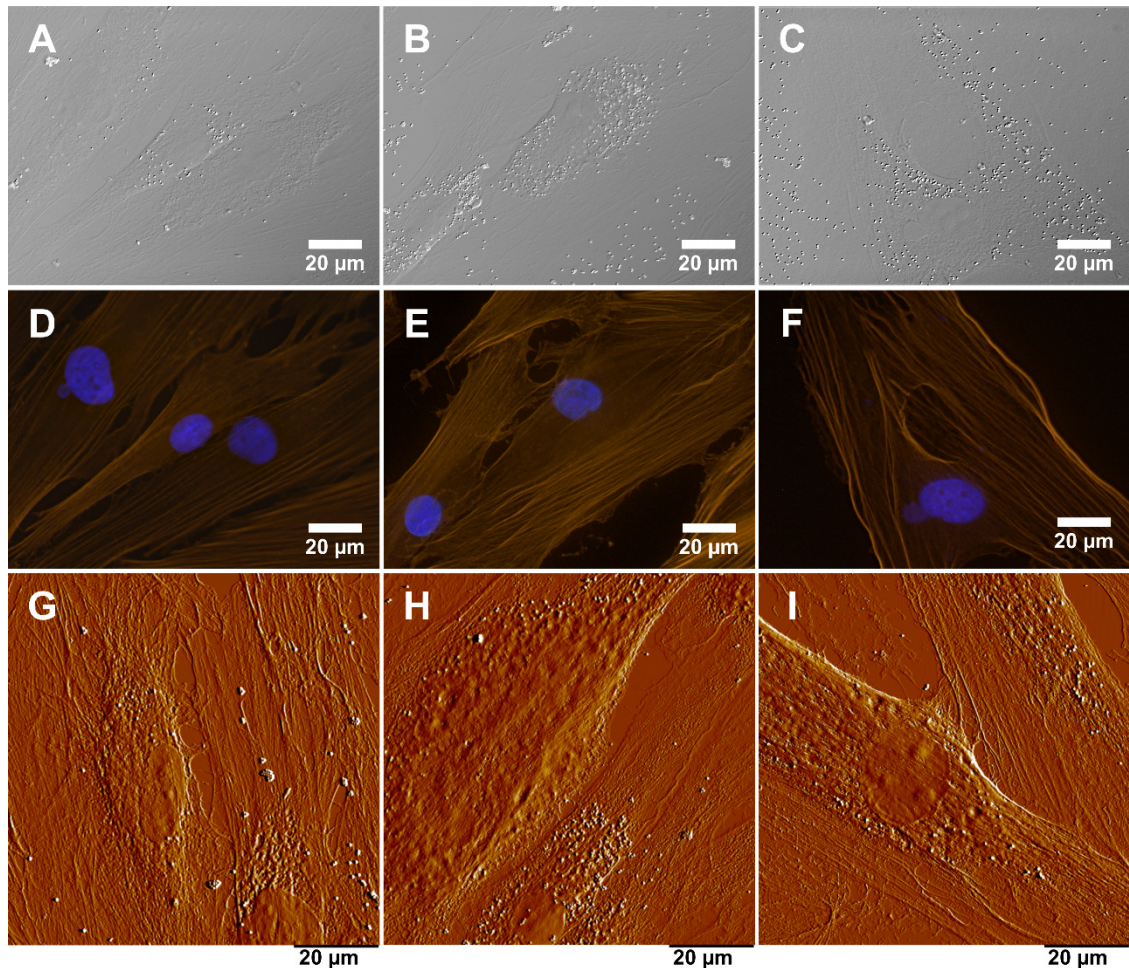

**Supplementary Figure S1. Cellular morphology during long-term incubation with 500 nm polystyrene particles.** (A-C) Bright-field, (D-F) fluorescence, and (G-I) atomic force microscopy images of human skin fibroblasts after (A-G) 24, (B-H) 48, and (C-I) 72 h of incubation with 500 nm microplastic particles at the 10 µg/mL concentration. F-actin (orange) and nuclei (blue) of cells were stained with phalloidin-TRITC and DAPI, respectively.

**Supplementary Video S1.** Dark-field image sequence of focus adjusting of human skin fibroblasts incubated with 500 nm polystyrene particles at the 10 µg/mL concentration. Exposure time – 0.2 s.

**Supplementary Video S2.** Dark-field image sequence of focus adjusting of human skin fibroblasts incubated with 500 nm polystyrene particles at the 10 µg/mL concentration. Exposure time – 1.0 s.
